# Supplementary material for: Effects of pH value and temperature on the initiation, promotion, inhibition and direct reaction rate constants of natural organic matter in ozonation
Source: Royal Society of Chemistry journal article supplement (doi:10.1039/c5ra19359a), 2016-01-01
Supplement: c5ra19359a1.pdf [file c5ra19359a1.pdf]

## **Supplementary Information**

# Effects of pH Value and Temperature on the Initiation, Promotion, Inhibition and Direct Reaction Rate Constants of Natural Organic Matter in Ozonation

Ee Ling Yong<sup>a</sup> and Yi-Pin Lin<sup>b\*</sup>

<sup>a</sup>Department of Environmental Engineering, Faculty of Civil Engineering, Universiti Teknologi  
Malaysia, 81310 Skudai, Johor, Malaysia.

<sup>b</sup>Graduate Institute of Environmental Engineering, National Taiwan University, No. 1, Sec. 4, Roosevelt  
Road, Taipei 10617, Taiwan

\*Corresponding author e-mail: [yipinlin@ntu.edu.tw](mailto:yipinlin@ntu.edu.tw)

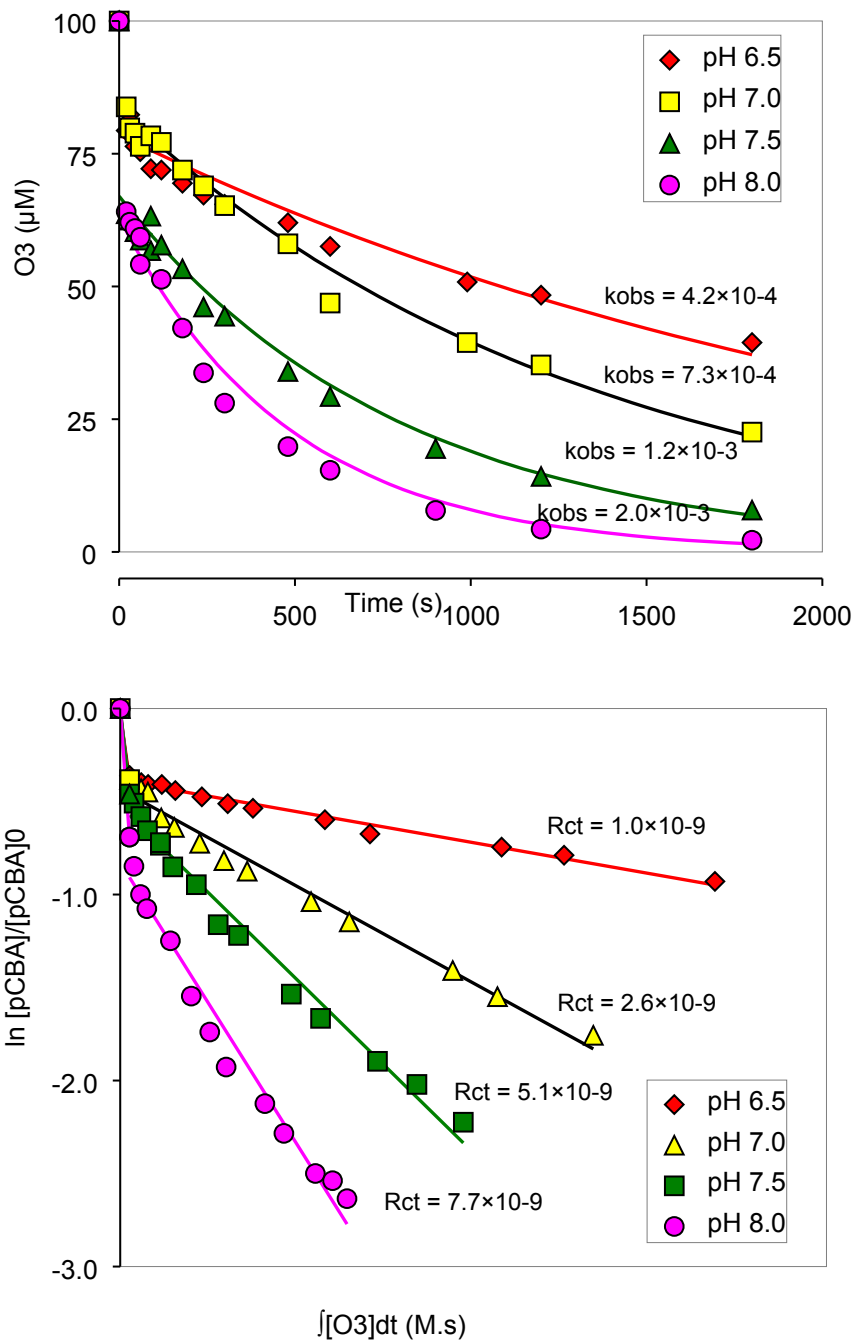

Fig.S1 (a) Ozone decomposition as a function of time and (b)  $R_{ct}$  plots at various pH values. Experimental conditions: SRFA = 2.0 mg/L, temperature =  $21 \pm 1^\circ\text{C}$ , initial ozone concentration = 0.1 mM, *tert*-butanol = 0.1 mM, pCBA = 0.5 μM and phosphate buffer = 1.0 mM.

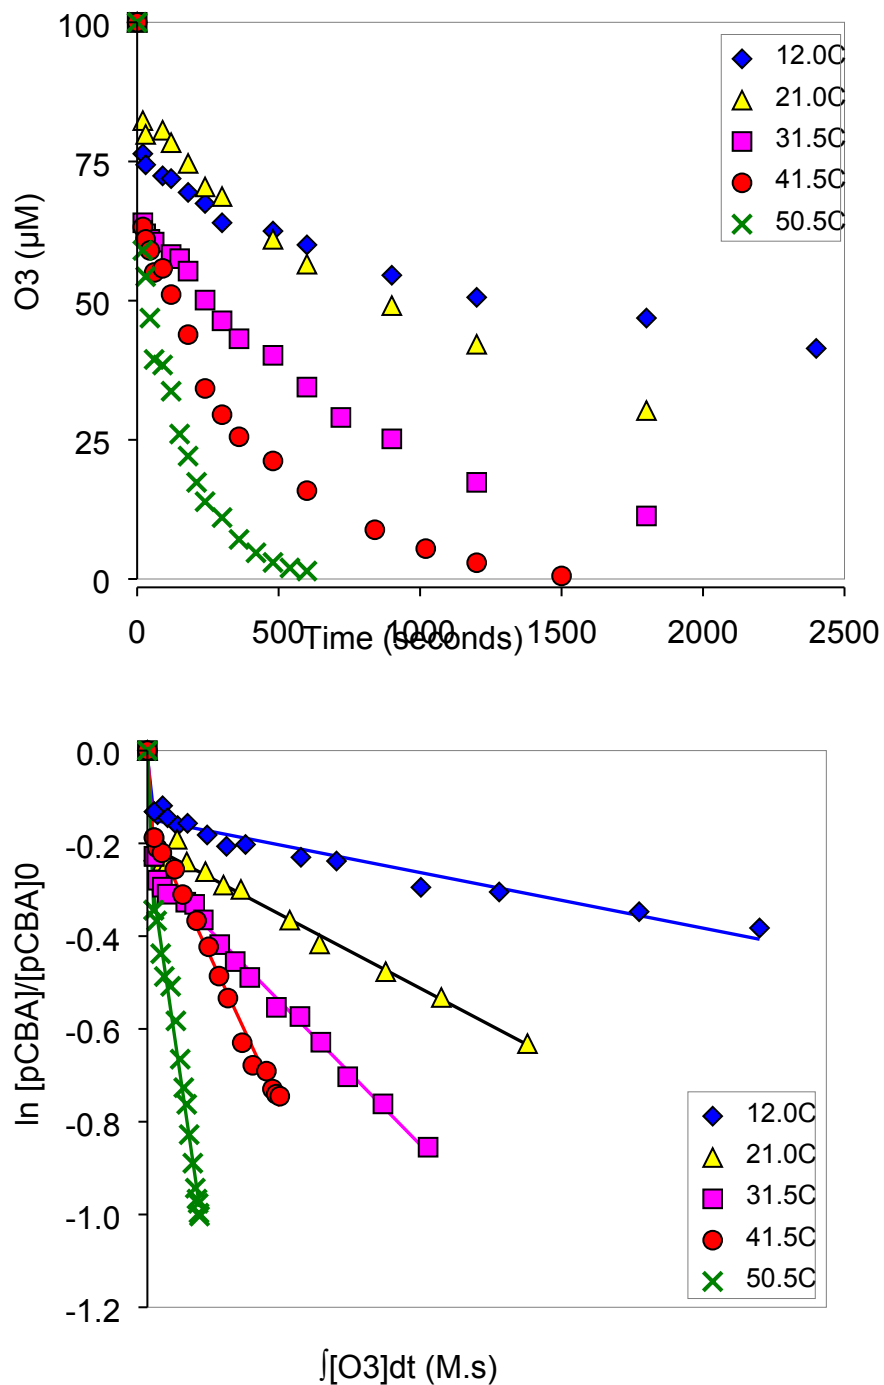

Fig.S2 (a) Ozone decomposition as a function of time and (b)  $R_{ct}$  plots for temperature ranging from 12.0°C to 50.5°C. Experimental conditions: SRFA = 2.0 mg/L, pH 7.0, initial ozone concentration = 0.1 mM, *tert*-butanol = 0.1 mM, pCBA = 0.5 μM and phosphate buffer = 1.0 mM.
